# Supplementary material
Source: PubMed Central journal article supplement (PMC5363368)
Supplement: EJI-47-458-s002.pdf [file EJI-47-458-s002.pdf]

# European Journal of Immunology

Supporting Information  
for

**DOI 10.1002/eji.201646855**

Anna-Lena Vogel, Benjamin Knier, Katja Lammens, Sudhakar Reddy Kalluri,  
Tanja Kuhlmann, Jeffrey L. Bennett and Thomas Korn

**Deletional tolerance prevents AQP4-directed autoimmunity in mice**

## Supporting Information

### Supplementary Figure 1

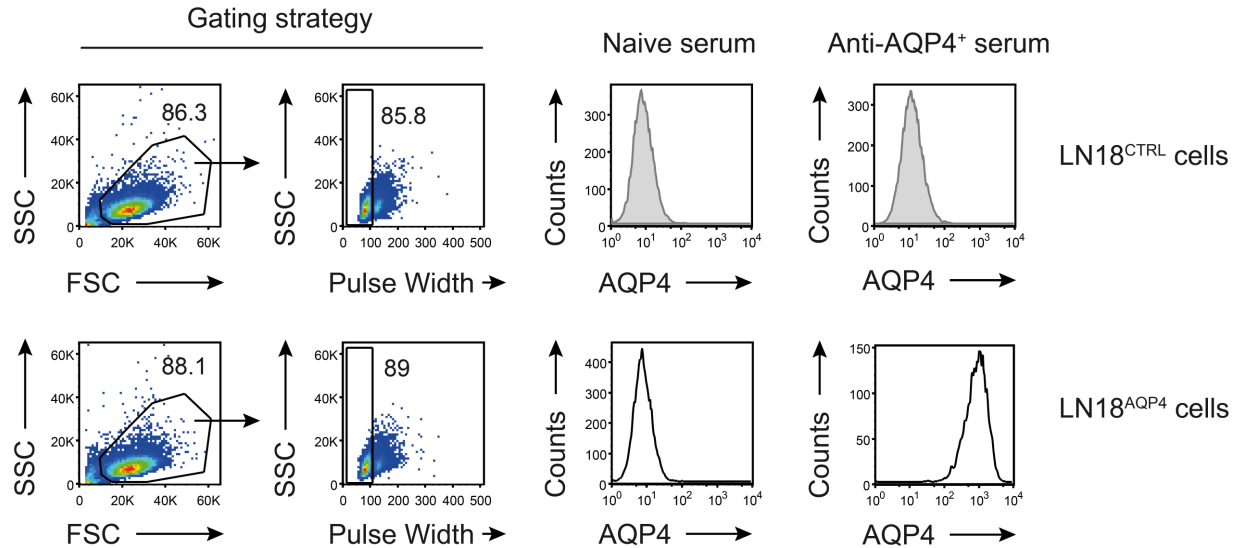

**Supplementary Figure 1. Cell based assay to measure conformational anti-AQP4 antibodies in sera of mice.** LN18 cells were either transduced with empty vector (LN18<sup>CTRL</sup> cells, top row) or with an AQP4 expressing lentivirus (LN18<sup>AQP4</sup> cells, bottom row). LN18<sup>CTRL</sup> or LN18<sup>AQP4</sup> cells were incubated with naive serum or anti-AQP4<sup>+</sup> serum as described in Materials and Methods. Anti-mouse total IgG H+L (AlexaFluor488 labeled) was used to detect anti-AQP4 antibodies bound to LN18<sup>CTRL</sup> cells (shaded histograms) or LN18<sup>AQP4</sup> cells (open histograms). Gating strategy and representative histogram plots. Numbers indicate percentage fractions of parental populations in the respective gates.

### Supplementary Table 1

AQP4 peptides (20-mers) overlapping by 15 amino acids and spanning the whole sequence of mouse AQP4 protein.

| Mouse AQP4 Peptides (20-mers) |               |                                  |
|-------------------------------|---------------|----------------------------------|
| Peptide No                    | AA residues   | Mouse 20-mer Peptides (Sequence) |
| P-01                          | mAQP4_1-20    | MSDRAAARRWGKCGHSCSRE             |
| P-02                          | mAQP4_6-25    | AARRWGKCGHSCSRESIMVA             |
| P-03                          | mAQP4_11-30   | GKCGHSCSRESIMVAFKGVW             |
| P-04                          | mAQP4_16-35   | SCSRESIMVAFKGVWTQAFW             |
| P-05                          | mAQP4_21-40   | SIMVAFKGVWTQAFWKAVSA             |
| P-06                          | mAQP4_26-45   | FKGVWTQAFWKAVSAEFLAT             |
| P-07                          | mAQP4_31-50   | TQAFWKAVSAEFLATLIFVL             |
| P-08                          | mAQP4_36-55   | KAVSAEFLATLIFVLLGVGS             |
| P-09                          | mAQP4_41-60   | EFLATLIFVLLGVGSTINWG             |
| P-10                          | mAQP4_46-65   | LIFVLLGVGSTINWGGSENP             |
| P-11                          | mAQP4_51-70   | LGVGSTINWGGSENPLPVDM             |
| P-12                          | mAQP4_56-75   | TINWGGSENPLPVDMVLISL             |
| P-13                          | mAQP4_61-80   | GSENPLPVDMVLISLCFGLS             |
| P-14                          | mAQP4_66-85   | LPVDMVLISLCFGLSIATMV             |
| P-15                          | mAQP4_71-90   | VLISLCFGLSIATMVQCFGH             |
| P-16                          | mAQP4_76-95   | CFGLSIATMVQCFGHISGGH             |
| P-17                          | mAQP4_81-100  | IATMVQCFGHISGGHINPAV             |
| P-18                          | mAQP4_86-105  | QCFGHISGGHINPAVTVAMV             |
| P-19                          | mAQP4_91-110  | ISGGHINPAVTVAMVCTRKI             |
| P-20                          | mAQP4_96-115  | INPAVTVAMVCTRKISIAKS             |
| P-21                          | mAQP4_100-120 | TVAMVCTRKISIAKSVFYII             |
| P-22                          | mAQP4_106-125 | CTRKISIAKSVFYIIAQCLG             |
| P-23                          | mAQP4_111-130 | SIKSVFYIIAQCLGAIIGA              |
| P-24                          | mAQP4_116-135 | VFYIIAQCLGAIIGAGILYL             |
| P-25                          | mAQP4_121-140 | AQCLGAIIGAGILYLVTPPS             |
| P-26                          | mAQP4_126-145 | AIIGAGILYLVTPPSVVGGGL            |
| P-27                          | mAQP4_131-150 | GILYLVTPPSVVGGGLGVTTV            |
| P-28                          | mAQP4_136-155 | VTPPSVVGGGLGVTTVHGNTL            |
| P-29                          | mAQP4_141-160 | VVGGGLGVTTVHGNTLTAGHGL           |
| P-30                          | mAQP4_146-165 | GVTTVHGNTLTAGHLLVELI             |

|      |               |                       |
|------|---------------|-----------------------|
| P-31 | mAQP4_151-170 | HGNLTAGHGLLVELIITFQL  |
| P-32 | mAQP4_156-175 | AGHGLLVELIITFQLVFTIF  |
| P-33 | mAQP4_161-180 | LVELIITFQLVFTIFASCDS  |
| P-34 | mAQP4_166-185 | ITFQLVFTIFASCDSKRTDV  |
| P-35 | mAQP4_171-190 | VFTIFASCDSKRTDVTGSIA  |
| P-36 | mAQP4_176-195 | ASCDSKRTDVTGSIALAIGF  |
| P-37 | mAQP4_181-200 | KRTDVTGSIALAIGFSVAIG  |
| P-38 | mAQP4_186-205 | TGSIALAIGFSVAIGHLFAI  |
| P-39 | mAQP4_191-210 | LAIGFSVAIGHLFAINYTGA  |
| P-40 | mAQP4_196-215 | SVAIGHLFAINYTGASMNPA  |
| P-41 | mAQP4_201-220 | HLFAINYTGASMNPARSFGP  |
| P-42 | mAQP4_206-225 | NYTGASMNPARSFGPAVIMG  |
| P-43 | mAQP4_211-230 | SMNPARSFGPAVIMGNWANH  |
| P-44 | mAQP4_216-235 | RSFGPAVIMGNWANHWIYWV  |
| P-45 | mAQP4_221-240 | AVIMGNWANHWIYWVGPIMG  |
| P-46 | mAQP4_226-245 | NWANHWIYWVGPIMGAVLAG  |
| P-47 | mAQP4_231-250 | WIYWVGPIMGAVLAGALYEV  |
| P-48 | mAQP4_236-255 | GPIMGAVLAGALYEVVFCPD  |
| P-49 | mAQP4_241-260 | AVLAGALYEVVFCPDVELKR  |
| P-50 | mAQP4_246-265 | ALYEVVFCPDVELKRRLKEA  |
| P-51 | mAQP4_251-270 | VFCPDVELKRRLKEAFSKAA  |
| P-52 | mAQP4_256-275 | VELKRRLKEAFSKAAQQTGK  |
| P-53 | mAQP4_261-280 | RLKEAFSKAAQQTGKSYMEV  |
| P-54 | mAQP4_266-285 | FSKAAQQTGKSYMEVEDNRS  |
| P-55 | mAQP4_271-290 | QQTGKSYMEVEDNRSQVETE  |
| P-56 | mAQP4_276-295 | SYMEVEDNRSQVETEDLILK  |
| P-57 | mAQP4_281-300 | EDNRSQVETEDLILKPGVVH  |
| P-58 | mAQP4_286-305 | QVETEDLILKPGVVHVIDID  |
| P-59 | mAQP4_291-310 | DLILKPGVVHVIDIDRGE EK |
| P-60 | mAQP4_296-315 | PGVVHVIDIDRGE EKKGKDS |
| P-61 | mAQP4_301-320 | VIDIDRGE EKKGKDSSEVL  |
| P-62 | mAQP4_304-323 | IDRGE EKKGKDSSEVLSSV  |

## Supplementary Table 2

AQP4 peptides (11-mers) overlapping by 10 amino acids and spanning the sequence of mouse AQP4(196-225).

| Mouse AQP4 "P41" region fine mapping (11-mers) |               |                                  |
|------------------------------------------------|---------------|----------------------------------|
| Peptide No                                     | AA residues   | Mouse 11-mer Peptides (Sequence) |
| P41-01                                         | mAQP4_196-206 | SVAIGHLFAIN                      |
| P41-02                                         | mAQP4_197-207 | VAIGHLFAINY                      |
| P41-03                                         | mAQP4_198-208 | AIGHLFAINYT                      |
| P41-04                                         | mAQP4_199-209 | IGHLFAINYTG                      |
| P41-05                                         | mAQP4_200-210 | GHLFAINYTGA                      |
| P41-06                                         | mAQP4_201-211 | HLFAINYTGAS                      |
| P41-07                                         | mAQP4_202-212 | LFAINYTGASM                      |
| P41-08                                         | mAQP4_203-213 | FAINYTGASMN                      |
| P41-09                                         | mAQP4_204-214 | AINYTGASMNP                      |
| P41-10                                         | mAQP4_205-215 | INYTGASMNPA                      |
| P41-11                                         | mAQP4_206-216 | NYTGASMNPAR                      |
| P41-12                                         | mAQP4_207-217 | YTGASMNPARS                      |
| P41-13                                         | mAQP4_208-218 | TGASMNPARSF                      |
| P41-14                                         | mAQP4_209-219 | GASMNPARSFG                      |
| P41-15                                         | mAQP4_210-220 | ASMNPARSFGP                      |
| P41-16                                         | mAQP4_211-221 | SMNPARSFGPA                      |
| P41-17                                         | mAQP4_212-222 | MNPARSFGPAV                      |
| P41-18                                         | mAQP4_213-223 | NPARSFGPAVI                      |
| P41-19                                         | mAQP4_214-224 | PARSFGPAVIM                      |
| P41-20                                         | mAQP4_215-225 | ARSFGPAVIMG                      |
